# Supplementary material for: Diagnostic Yield of Genetic Testing in Young Athletes With T-Wave Inversion
Source: PubMed Central journal article supplement — Circulation. 2018 Sep 17;138(12):1184–94. doi: 10.1161/CIRCULATIONAHA.118.034208 (PMC6147090; doi:10.1161/circulationaha.118.034208), 2018-09-17
Supplement: cir-138-1184-s001.pdf [file cir-138-1184-s001.pdf]

## SUPPLEMENTAL MATERIAL

### Supplemental Tables

**Supplemental Table 1. Genes analyzed for variants for cardiomyopathies and ion channel disorders associated with T-wave inversion**

| Condition   | Priority Genes Tested*                                                                                      | Other Candidate Genes Tested*                                                                                                                                                                                                                                                                                                                                                                                                                                                                                                                                                            |
|-------------|-------------------------------------------------------------------------------------------------------------|------------------------------------------------------------------------------------------------------------------------------------------------------------------------------------------------------------------------------------------------------------------------------------------------------------------------------------------------------------------------------------------------------------------------------------------------------------------------------------------------------------------------------------------------------------------------------------------|
| <b>HCM</b>  | ACTC1, DES, FLNC, GLA, LAMP2, MYBPC3, MYH7, MYL2, MYL3, PLN, PRKAG2, PTPN11, TNNC1, TNNI3, TNNT2, TPM1, TTR | AARS2, ACAD9, ACADVL, ACTA1, ACTN2, AGK, AGL, AGPAT2, ANK2, ANKRD1, ATP5E, ATPAF2, BRAF, BSCL2, CALR3, CAV3, COA5, COA6, COQ2, COX15, COX6B1, CRYAB, CSRP3, DLD, DSP, ELAC2, FAH, FHL1, FHL2, FHOD3, FOXRED1, FXN, GAA, GFM1, GLB1, GNPTAB, GUSB, HRAS, JPH2, KRAS, LDB3, LIAS, LZTR1, MAP2K1, MAP2K2, MLYCD, MRPL3, MRPL44, MRPS22, MTO1, MYH6, MYOM1, MYOZ2, MYPN, NEXN, NF1, NRAS, OBSCN, PDHA1, PHKA1, PMM2, RAF1, SCO2, SHOC2, SLC22A5, SLC25A3, SLC25A4, SOS1, SURF1, TAZ, TCAP, TMEM70, TRIM63, TSFM, TTN, VCL, BAG3, CASQ2, IDH2, KCNJ8, KLF10, LMNA, MURC, MYLK2, OBSL1, PDLIM3 |
| <b>ARVC</b> | DSC2, DSG2, DSP, FLNC, JUP, PKP2, PLN, TMEM43                                                               | CTNNA3, DES, LMNA, RYR2, TGFB3, TTN, CASQ2, CTNNB1, LDB3, PERP, PKP4, PPP1R13L, SCN5A                                                                                                                                                                                                                                                                                                                                                                                                                                                                                                    |
| <b>DCM</b>  | ACTC1, BAG3, DES,                                                                                           | ABCC9, ACTA1, ACTN2, ALMS1, ANKRD1, ANO5,                                                                                                                                                                                                                                                                                                                                                                                                                                                                                                                                                |

|             |                                                                                                       |                                                                                                                                                                                                                                                                                                                                                                                                                                                                                                                      |
|-------------|-------------------------------------------------------------------------------------------------------|----------------------------------------------------------------------------------------------------------------------------------------------------------------------------------------------------------------------------------------------------------------------------------------------------------------------------------------------------------------------------------------------------------------------------------------------------------------------------------------------------------------------|
|             | DMD, DSP, FLNC,<br>LMNA, MYBPC3, MYH7,<br>PKP2, PLN, RBM20,<br>TAZ, TNNC1, TNNI3,<br>TNNT2, TPM1, TTN | CAV3, CHRM2, COL741, CRYAB, CSRP3, DNAJC19,<br>DOLK, DSC2, DSG2, EMD, EYA4, FHL2, FHOD3,<br>FKRP, FKTN, FOXD4, GAA, GATA4, GATA6,<br>GATAD1, GLB1, HFE, JUP, LAMA2, LAMA4, LAMP2,<br>LDB3, MURC, MYH6, MYL2, MYL3, MYOT, MYPN,<br>NEBL, NEXN, PRDM16, PSEN1, PSEN2, RAF1, RYR2,<br>SCN5A, SDHA, SGCD, SLC22A5, SPEG, SYNE1,<br>SYNE2, TBX20, TCAP, TMEM43, TMPO, TOR1AIP1,<br>TTR, TXNRD2, VCL, XK, BRAF, DNMT1L, GATA5, GLA,<br>IDH2, ILK, KCNJ2, KCNJ8, NKX2-5, OBSCN, OPA3,<br>PDLIM3, PTPN11, SGCA, SGCB, TNNI3K |
| <b>LVNC</b> | ACTC1, MYBPC3,<br>MYH7, TAZ                                                                           | ACTN2, DMD, DNAJC19, DTNA, FHL1, HCN4, LDB3,<br>LMNA, MIB1, MYH6, MYL2, NKX2-5, NNT, PLN,<br>PRDM16, RYR2, TNNT2, TPM1, ANKRD1, BAG3,<br>CASQ2, CSRP3, DSP, FLNC, KCNH2, KCNQ1, MLYCD,<br>MYL3, NOTCH1, PTPN11, TNNC1, TNNI3, TTN                                                                                                                                                                                                                                                                                    |
| <b>LQTS</b> | CACNA1C, KCNE1,<br>KCNE2, KCNH2, KCNJ2,<br>KCNQ1, SCN5A                                               | AKAP9, ANK2, CALM1, CALM2, CALM3, CAV3,<br>KCND2, KCNJ5, RYR2, SCN4B, SNTA1, TRDN, FHL2,<br>HCN4, KCNA5, KCND3, KCNE5, KCNE3, NOS1AP,<br>PTRF, SCN1B                                                                                                                                                                                                                                                                                                                                                                 |

|            |                                                      |                                                                                                                                              |
|------------|------------------------------------------------------|----------------------------------------------------------------------------------------------------------------------------------------------|
| <b>BrS</b> | SCN5A, CACNA1C,<br>CACNA2D1, CACNB2,<br>KCNJ8, SCN1B | SCN10A, ABCC9, ANK2, FGF12, GPD1L, HCN4,<br>KCND2, KCND3, KCNE5, KCNE3, PKP2, RANGRF,<br>SCN2B, SCN3B, SLMAP, TRPM4, ANK3, CACNA1D,<br>KCNH2 |
|------------|------------------------------------------------------|----------------------------------------------------------------------------------------------------------------------------------------------|

ARVC indicates arrhythmogenic right ventricular cardiomyopathy; BrS, Brugada syndrome; DCM, dilated cardiomyopathy; HCM, hypertrophic cardiomyopathy; LQTS, long QT syndrome; LVNC, left ventricular non-compaction.

\*For full, official gene names, the reader is referred to the US National Center for Biotechnology Information (NCBI) online searchable database at <https://www.ncbi.nlm.nih.gov/gene/>

**Supplemental Table 2. Summary of criteria used to determine variant pathogenicity**

| CLASSIFICATION                                                | MAJOR CRITERIA                                                                                                                                                                                                                                                                                                                                                                                                                                         | SUPPORTING CRITERIA                                                                                                                                                                                                                                                                                                                                                                                                                                                                                                                                      |
|---------------------------------------------------------------|--------------------------------------------------------------------------------------------------------------------------------------------------------------------------------------------------------------------------------------------------------------------------------------------------------------------------------------------------------------------------------------------------------------------------------------------------------|----------------------------------------------------------------------------------------------------------------------------------------------------------------------------------------------------------------------------------------------------------------------------------------------------------------------------------------------------------------------------------------------------------------------------------------------------------------------------------------------------------------------------------------------------------|
| <b>1. PATHOGENIC<br/>OR DISEASE<br/>CAUSING</b>               | <ol style="list-style-type: none"> <li>1. Widely reported variant with conclusive evidence of a genotype-phenotype association and with consensus about its pathogenicity</li> <li>2. Demonstrated co-segregation with a phenotype (&gt;10 meioses)</li> <li>3. Co-segregation in at least 2 families (<math>\leq 10</math> meioses), or present in at least 5 probands with the same phenotype, and meeting at least 2 supporting criteria</li> </ol> | <ol style="list-style-type: none"> <li>1. Protein-truncating variant in a gene where loss of function is a proven pathogenic mechanism</li> <li>2. Functional studies that support pathogenicity</li> <li>3. <i>De novo</i> presentation in the setting of a novel disease in the family (maternity and paternity confirmed)</li> <li>4. Missense variant that generates the same amino-acid change as a previously reported pathogenic variant</li> <li>5. Variant with very low frequency/absent in the control population (MAF &lt;0.001%)</li> </ol> |
| <b>2. VERY LIKELY<br/>TO BE<br/>PATHOGENIC<br/>OR DISEASE</b> | <ol style="list-style-type: none"> <li>1. Protein-truncating variant in a gene where loss of function is a proven pathogenic mechanism that explains the patient's phenotype, and that meets at least 1 supporting criterion</li> </ol>                                                                                                                                                                                                                | <ol style="list-style-type: none"> <li>1. Functional studies that support pathogenicity</li> <li>2. <i>De novo</i> presentation in the setting of a novel disease in the family (maternity and paternity confirmed)</li> <li>3. Affecting a residue in which other pathogenic variants</li> </ol>                                                                                                                                                                                                                                                        |

|                                                             |                                                                                                                                                                                                                                                                                                                                                                                           |                                                                                                                                                                                                                                                                                                                                                                                                  |
|-------------------------------------------------------------|-------------------------------------------------------------------------------------------------------------------------------------------------------------------------------------------------------------------------------------------------------------------------------------------------------------------------------------------------------------------------------------------|--------------------------------------------------------------------------------------------------------------------------------------------------------------------------------------------------------------------------------------------------------------------------------------------------------------------------------------------------------------------------------------------------|
| <p><b>CAUSING</b></p>                                       | <p>2. Missense variant/in-frame insertion or deletion in a non-repetitive region of a gene with demonstrated genotype-phenotype association that explains the patient's disease, and that meets at least 2 supporting criteria</p>                                                                                                                                                        | <p>were previously identified. (mutational hot spot); or variant located in a relevant functional domain or region of the protein</p> <p>4. Variant with very low allelic frequency/absent in the control population (MAF &lt;0.001%)</p> <p>5. Probable co-segregation in at least one family, or various index cases, but that does not meet criteria for being considered pathogenic</p>      |
| <p><b>3. LIKELY TO BE PATHOGENIC OR DISEASE CAUSING</b></p> | <p>1. Protein-truncating variant with very low frequency or absent in the control population (MAF &lt;0.001%) that affects a gene where loss of function is not an established pathogenic mechanism or that does not meet criteria to be considered pathogenic</p> <p>2. Intronic variant outside the consensus region of the gene for which the bioinformatics predictors agree that</p> | <p>1. Variant with very low allelic frequency/absent in the control population (MAF &lt;0.001%)</p> <p>2. <i>De novo</i> presentation in the setting of a novel disease in the family (maternity and paternity unconfirmed)</p> <p>3. Patient's phenotype or family history suggests that disease could be explained by mutations in the gene (gene with well-established phenotype-genotype</p> |

|                                                |                                                                                                                                                                                                                                                                         |                                                                                                                                                                                                                                                                                               |
|------------------------------------------------|-------------------------------------------------------------------------------------------------------------------------------------------------------------------------------------------------------------------------------------------------------------------------|-----------------------------------------------------------------------------------------------------------------------------------------------------------------------------------------------------------------------------------------------------------------------------------------------|
|                                                | <p>it would affect the splicing</p> <p>3. Missense variant/in-frame insertion or deletion in a non-repetitive region of a gene which does not meet criteria to be considered pathogenic/very likely to be pathogenic, but that meets at least 3 supporting criteria</p> | <p>association)</p> <p>4. Bioinformatics predictors agree that it would be deleterious</p> <p>5. Located in a mutational hot-spot, functional domain, or relevant region of the codified protein</p> <p>6. Reported in at least 2 unrelated individuals that presented the same phenotype</p> |
| <b>4. UNKNOWN CLINICAL SIGNIFICANCE</b>        | <p>1. Variants with contradictory information about their pathogenicity</p> <p>2. Variants that do not meet criteria for being included in another classification category</p>                                                                                          |                                                                                                                                                                                                                                                                                               |
| <b>5. UNLIKELY TO BE PATHOGENIC OR DISEASE</b> | <p>1. Variant allele frequency in control populations is higher than the expected for disease or has a MAF &gt;0.05%</p> <p>2. Absence of variant co-segregation with the phenotype in at least 1 family</p>                                                            | <p>1. Missense variant in a gene where only variants causing protein truncation have shown association with disease</p> <p>2. Functional study showing that the variant does not</p>                                                                                                          |

|                                                    |                                                                                                                                                                                                                                                                                                                               |                                                                                                                                                                                                                                                                                                                                                                                                                  |
|----------------------------------------------------|-------------------------------------------------------------------------------------------------------------------------------------------------------------------------------------------------------------------------------------------------------------------------------------------------------------------------------|------------------------------------------------------------------------------------------------------------------------------------------------------------------------------------------------------------------------------------------------------------------------------------------------------------------------------------------------------------------------------------------------------------------|
| <p><b>CAUSING</b></p>                              | <p>3. Meeting at least 2 supporting criteria</p>                                                                                                                                                                                                                                                                              | <p>affect the structure or function of the encoded protein</p> <p>3. Bioinformatics predictors agree that the variant would not alter the function of the protein (including splicing variants outside the consensus region of the gene)</p> <p>4. In-frame insertions/deletions in a repetitive gene region without a known function</p> <p>5. Presence of the variant in homozygosis in control population</p> |
| <p><b>NON-PATHOGENIC (NOT DISEASE CAUSING)</b></p> | <p>1. MAF &gt;5% in any of the control population databases</p> <p>2. Previously reported in the literature with well-established evidence of consensus about its non-disease-causing classification, and with no contradictory data</p> <p>3. Absence of co-segregation with the disease in at least 2 reported families</p> | <p>1. Variant allele frequency in control populations is higher than expected for disease or has a MAF &gt;0.05%</p> <p>2. Absence of co-segregation of the variant with the phenotype in at least 1 family</p> <p>3. Functional study showing that the variant does not affect the structure or function of the encoded protein</p> <p>4. Presence of the variant in healthy unaffected subjects</p>            |

|  |                                           |                                                                                                                                                                     |
|--|-------------------------------------------|---------------------------------------------------------------------------------------------------------------------------------------------------------------------|
|  | 4. Meeting at least 2 supporting criteria | at an age at which the disease should be fully penetrant (variant must be in homozygosis in recessively inherited diseases, or in hemizygosis in X-linked diseases) |
|--|-------------------------------------------|---------------------------------------------------------------------------------------------------------------------------------------------------------------------|

MAF indicates minor allele frequency.



**Supplemental Table 3. Relevant genetic variants found in black and white athletes**

| Athlete               | Gene   | Clinical Disease Associated with Identified Variant | Genotype and Population Frequency of Variant in Individuals in Control Populations | Pathogenicity | Sequence change*          | Amino acid change*       | Phenotype |
|-----------------------|--------|-----------------------------------------------------|------------------------------------------------------------------------------------|---------------|---------------------------|--------------------------|-----------|
| <b>White Athletes</b> |        |                                                     |                                                                                    |               |                           |                          |           |
| 15                    | MYBPC3 | HCM                                                 | Heterozygous; mutation (<0.0001, no homozygotes)                                   | Pathogenic    | NM_000256.3:<br>c.1624G>C | NP_000247.2:p.Glu542Gln  | Positive  |
| 74                    | GLA    | Fabry disease                                       | Hemizygous; mutation (not found in controls)                                       | Pathogenic    | NM_000169.2:<br>c.902G>A  | NP_000160.1:p.Arg301Gln  | Positive  |
| 77                    | MYBPC3 | HCM                                                 | Heterozygous; mutation (<0.0001, no                                                | Pathogenic    | NM_000256.3:<br>c.3065G>C | NP_000247.2:p.Arg1022Pro | Positive  |

|                       |        |         |                                                        |                      |                           |                          |          |
|-----------------------|--------|---------|--------------------------------------------------------|----------------------|---------------------------|--------------------------|----------|
|                       |        |         | homozygotes)                                           |                      |                           |                          |          |
| 49                    | MYBPC3 | HCM     | Heterozygous;<br>mutation (<0.0001, no<br>homozygotes) | Likely<br>pathogenic | NM_000256.3:<br>c.2552C>T | NP_000247.2:p.Ala851Val  | Positive |
| 55                    | MYPBC3 | HCM     | Heterozygous;<br>mutation (<0.0001, no<br>homozygotes) | Likely<br>pathogenic | NM_000256.3:<br>c.2198G>A | NP_000247.2: p.Arg733His | Positive |
| 60                    | MYH7   | HCM     | Heterozygous;<br>mutation (<0.0001, no<br>homozygotes) | Likely<br>pathogenic | NM_000257.3:<br>c.3134G>T | NP_000248.2:p.Arg1045Leu | Positive |
| 75                    | SCN5A  | LQTS    | Heterozygous; rare<br>variant (<1%)                    | Likely<br>pathogenic | NM_198056.2:<br>c.3911C>T | NP_932173.1:p.Thr1304Met | Negative |
| <b>Black Athletes</b> |        |         |                                                        |                      |                           |                          |          |
| 39                    | TTR    | Amyloid | Heterozygous;<br>polymorphism (≥1%)                    | Pathogenic           | NM_000371.3:<br>c.424G>A  | NP_000362.1:p.Val142Ile  | Negative |

|    |       |                   |                                                        |                      |                           |                         |          |
|----|-------|-------------------|--------------------------------------------------------|----------------------|---------------------------|-------------------------|----------|
| 3  | MYH7  | HCM               | Heterozygous;<br>mutation (not in<br>controls)         | Likely<br>pathogenic | NM_000257.3:<br>c.4259G>A | NP_000248.2:p.Arg142Gln | Positive |
| 92 | ACTC1 | HCM, DCM,<br>LVNC | Heterozygous;<br>mutation (<0.0001, no<br>homozygotes) | Likely<br>pathogenic | NM_005159.4:<br>c.886T>C  | NP_005150.1:p.Tyr296His | Positive |

ACTC1 indicates Actin alpha, cardiac muscle 1; DCM dilated cardiomyopathy; GLA, galactosidase alpha; HCM, hypertrophic cardiomyopathy; LQTS, long QT syndrome; LVNC, left ventricular non-compaction; MYBPC3, myosin binding protein C; MYH7, myosin heavy chain 7; SCN5A, sodium voltage-gated channel alpha subunit 5; and TTR, transthyretin.

\*For additional information about genomic variants, see <https://www.ncbi.nlm.nih.gov/clinvar>
